# Supplementary material for: Development of phenotypic assays for identifying novel blockers of L-type calcium channels in neurons
Source: PubMed Central journal article supplement (PMC7801380; doi:10.1038/s41598-020-80692-5), 2021-01-11
Supplement: 41598_2020_80692_MOESM1_ESM.pdf [file 41598_2020_80692_MOESM1_ESM.pdf]

**Development of phenotypic assays for identifying novel blockers of L-type calcium  
channels in neurons**

Rebecca Hagan<sup>1</sup>, Elizabeth Rex<sup>2</sup>, David Woody<sup>2</sup>, Monika Milewski<sup>2</sup>, Thomas Glaza<sup>2</sup>, Michael P.  
Maher<sup>1</sup> and Yi Liu<sup>1\*</sup>

Neuroscience Discovery<sup>1</sup> and Discovery Sciences<sup>2</sup>, Janssen Research & Development, L.L.C.,  
3210 Merryfield Row, San Diego, CA, 92121, USA

\*Corresponding author: Yi Liu

Email: [yliu10@its.jnj.com](mailto:yliu10@its.jnj.com)

Tel: 1-858-784-3196

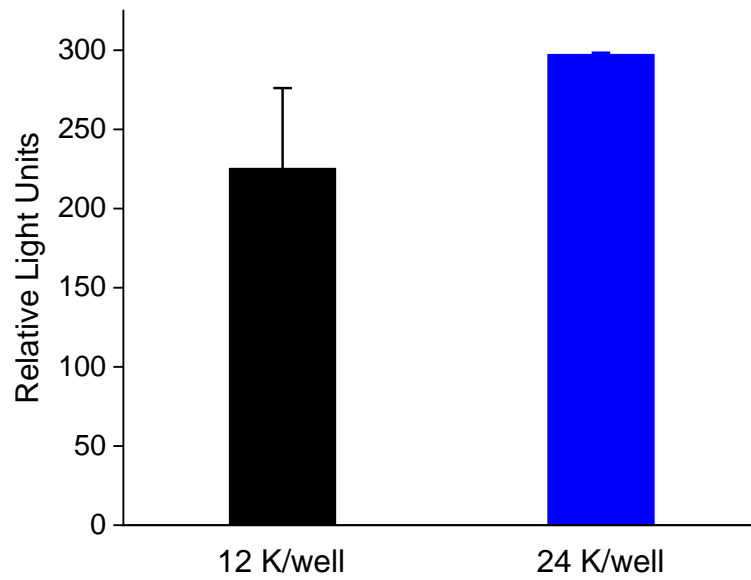

**Supplementary Figure 1. Bay K8644 (1.1  $\mu$ M)-induced fluorescent responses at two cell densities (12 and 24K/well).** The responses at the two densities are not significantly different ( $p>0.2$ ;  $n=3$  each).

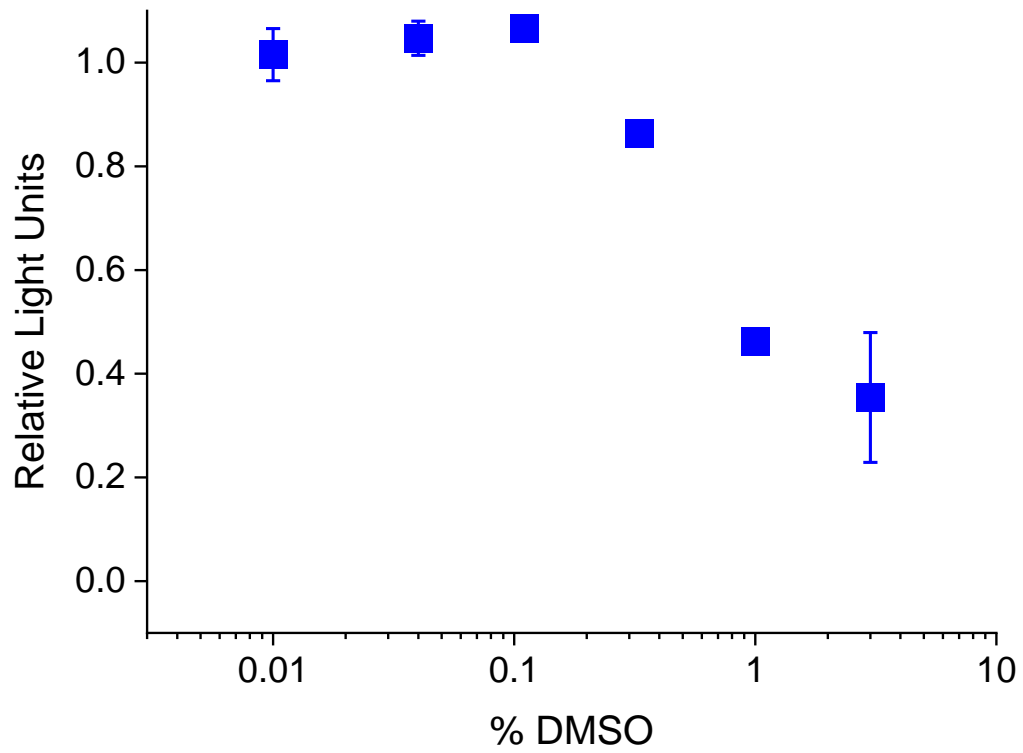

**Supplementary Figure 2. DMSO concentration-dependently inhibited Bay K (1.1  $\mu$ M)-induced fluorescent responses (n=4).**
